# Supplementary material
Source: PubMed Central journal article supplement (PMC2650365)
Supplement: 0813179106_0813179106SI.pdf [file 0813179106_0813179106SI.pdf]

# Supporting Information

Kim *et al.* 10.1073/pnas.0813179106

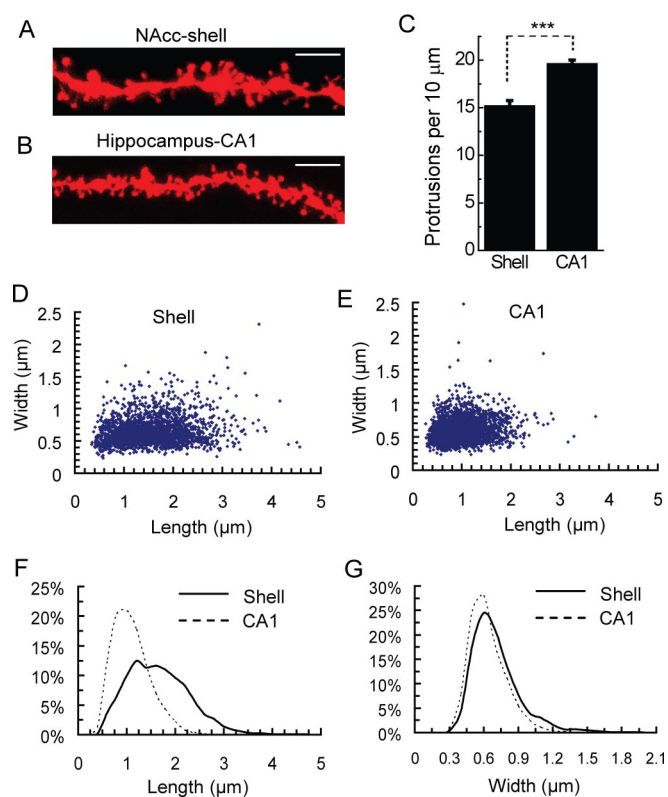

**Fig. S1.** Comparison of dendritic spine morphology of MSN from the shell of NAcc and pyramidal neurons from hippocampal CA1. Representative dendritic segments of MSN from the shell of NAcc (A) and pyramidal neurons from the CA1 region of hippocampus (B). (Scale bars, 5  $\mu\text{m}$ .) (C) The density of dendritic protrusions (number of protrusions per 10- $\mu\text{m}$  dendrite length; mean  $\pm$  SEM); \*\*\*,  $P < 0.001$ , Kolmogorov-Smirnov test. The distribution of spine head width and spine length in MSN from the shell of NAcc (D) and in pyramidal neurons from hippocampus CA1 (E). Comparison of spine length (F) or width (G) between MSN and pyramidal neurons. The total numbers of dendrites analyzed were 37 for MSN from NAcc shell and 40 for pyramidal neurons from hippocampus CA1.
